# Supplementary material for: In situ surface reconstruction of a Ni-based perovskite hydroxide catalyst for an efficient oxygen evolution reaction
Source: Royal Society of Chemistry journal article supplement (doi:10.1039/d1ta08531j), 2021-12-13
Supplement: d1ta08531j1.pdf [file d1ta08531j1.pdf]

# **In Situ Surface Reconstruction of a Ni-based Perovskite Hydroxide Catalyst for an Efficient Oxygen Evolution Reaction**

Yegui Fang<sup>a</sup>, Yusheng Fang<sup>a</sup>, Ruoqi Zong<sup>a</sup>, Zhouyang Yu<sup>a</sup>, Youkun  
Tao<sup>b</sup>, Jing Shao<sup>a\*</sup>

<sup>a</sup> College of Chemistry and Environmental Engineering, Shenzhen  
University, Shenzhen 518060, China;

<sup>b</sup>School of Science, Harbin Institute of Technology, Shenzhen 518055,  
China.

\*Corresponding author

E-mail address: [shaojing@szu.edu.cn](mailto:shaojing@szu.edu.cn)

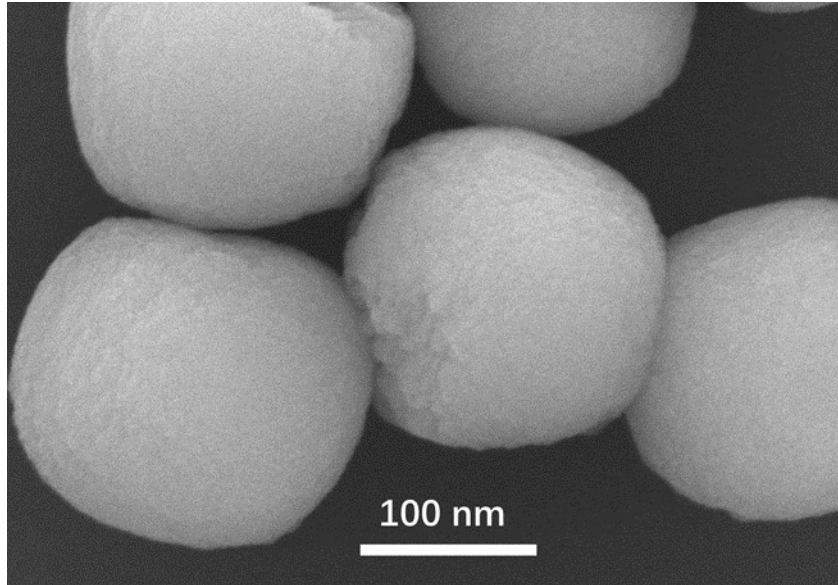

**Figure S1.** SEM image of NiSn(OH)<sub>6</sub> nano particles prepared by coprecipitation method.

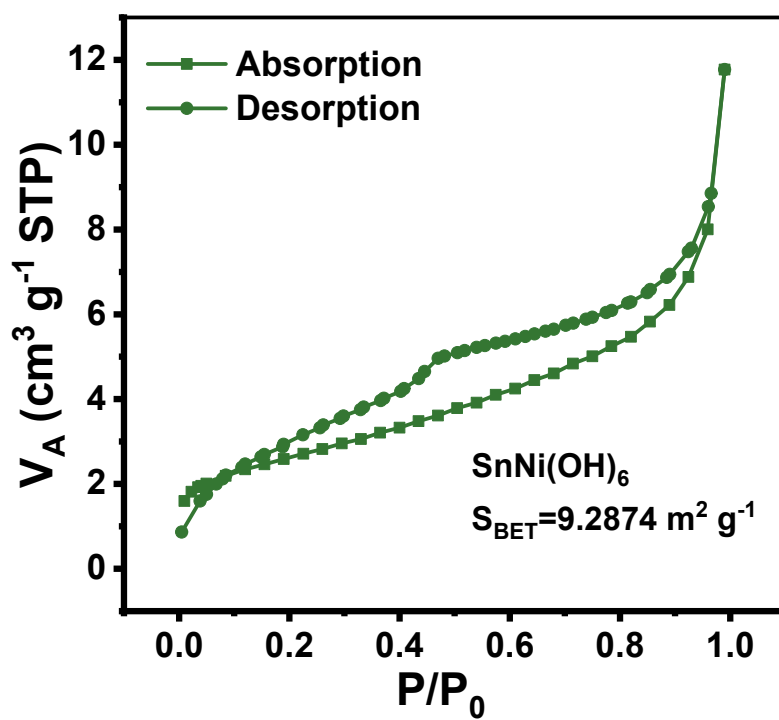

Figure S2. BET adsorption desorption curve of NiSn(OH)<sub>6</sub>.

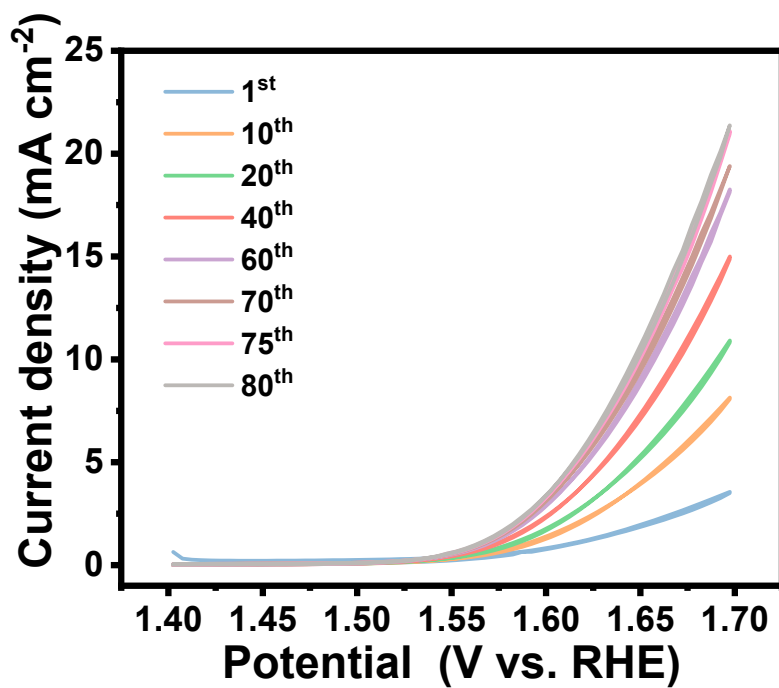

**Figure S3.** CV cycling curves on NiSn(OH)<sub>6</sub> in the potential range of 0.5 V-0.8 V (vs. Hg/HgO) with the sweep rate of 10 mV s<sup>-1</sup>.

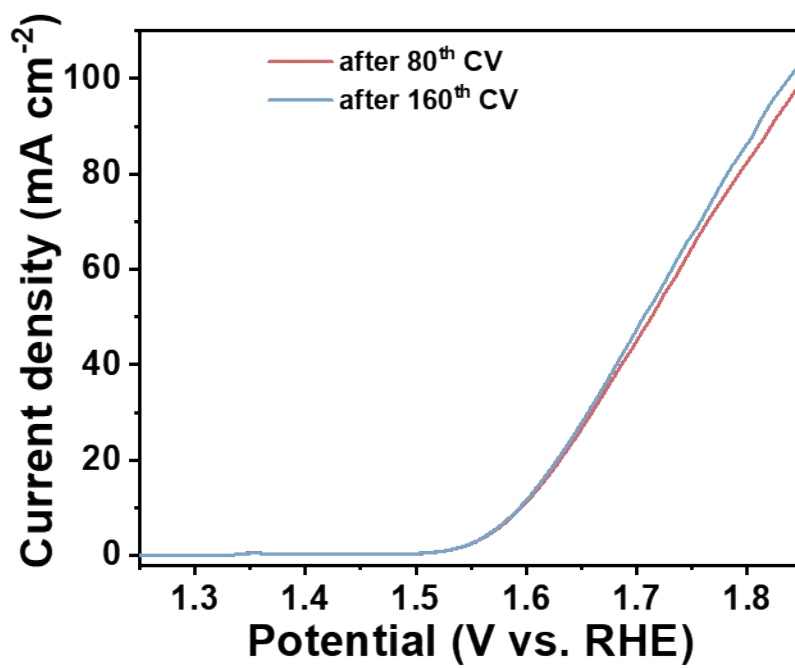

**Figure S4.** LSV curves of the catalyst after 80 CV cycles and after 160 CV cycles without iR correction.

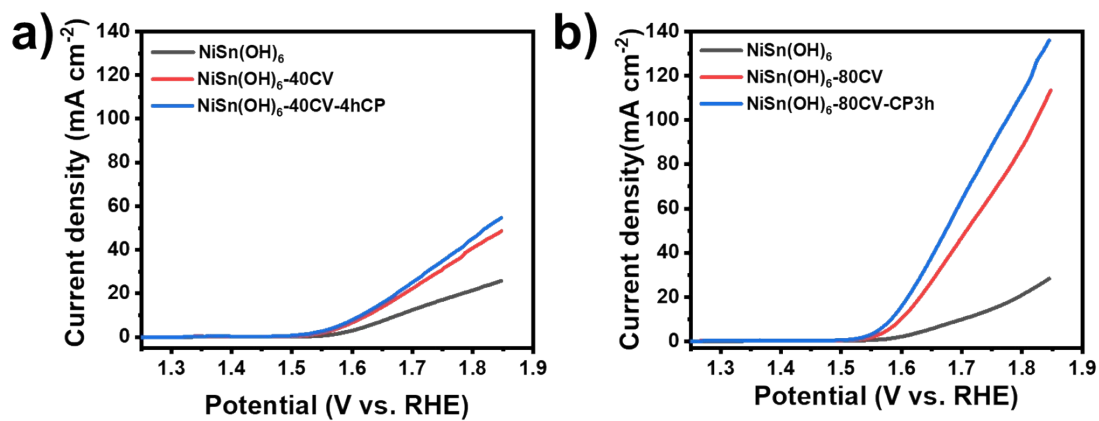

**Figure S5.** NiSn(OH)<sub>6</sub> activated by different procedures: (a) 40 CV cycles followed by galvanostatic polarization for 4 h; (b) 80 CV cycles followed by galvanostatic polarization for 3 h.

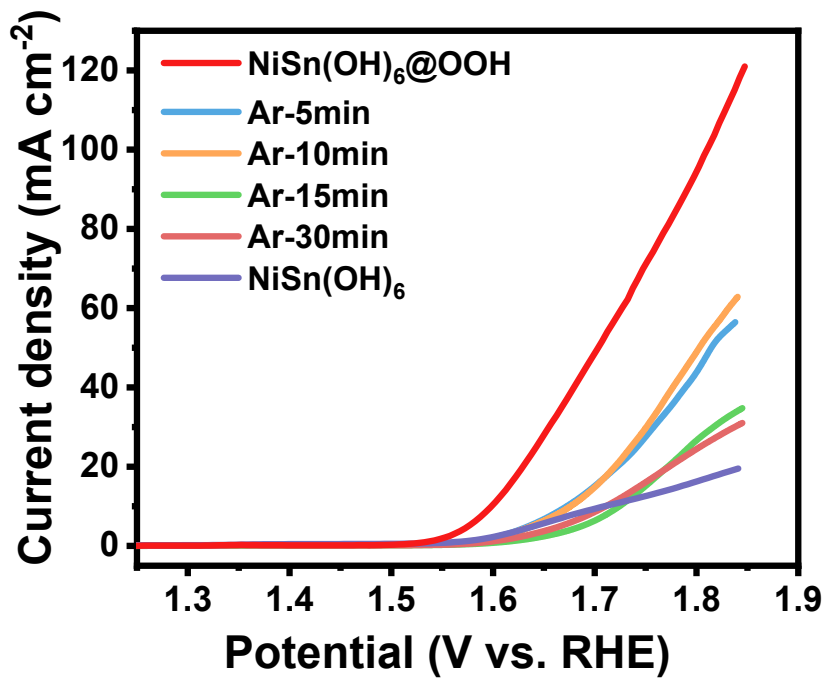

**Figure S6.** LSV curves without iR correction on NiSn(OH)<sub>6</sub> activated by CV cycling (denoted as NiSn(OH)<sub>6</sub>@OOH) and Ar plasma etching for different times.

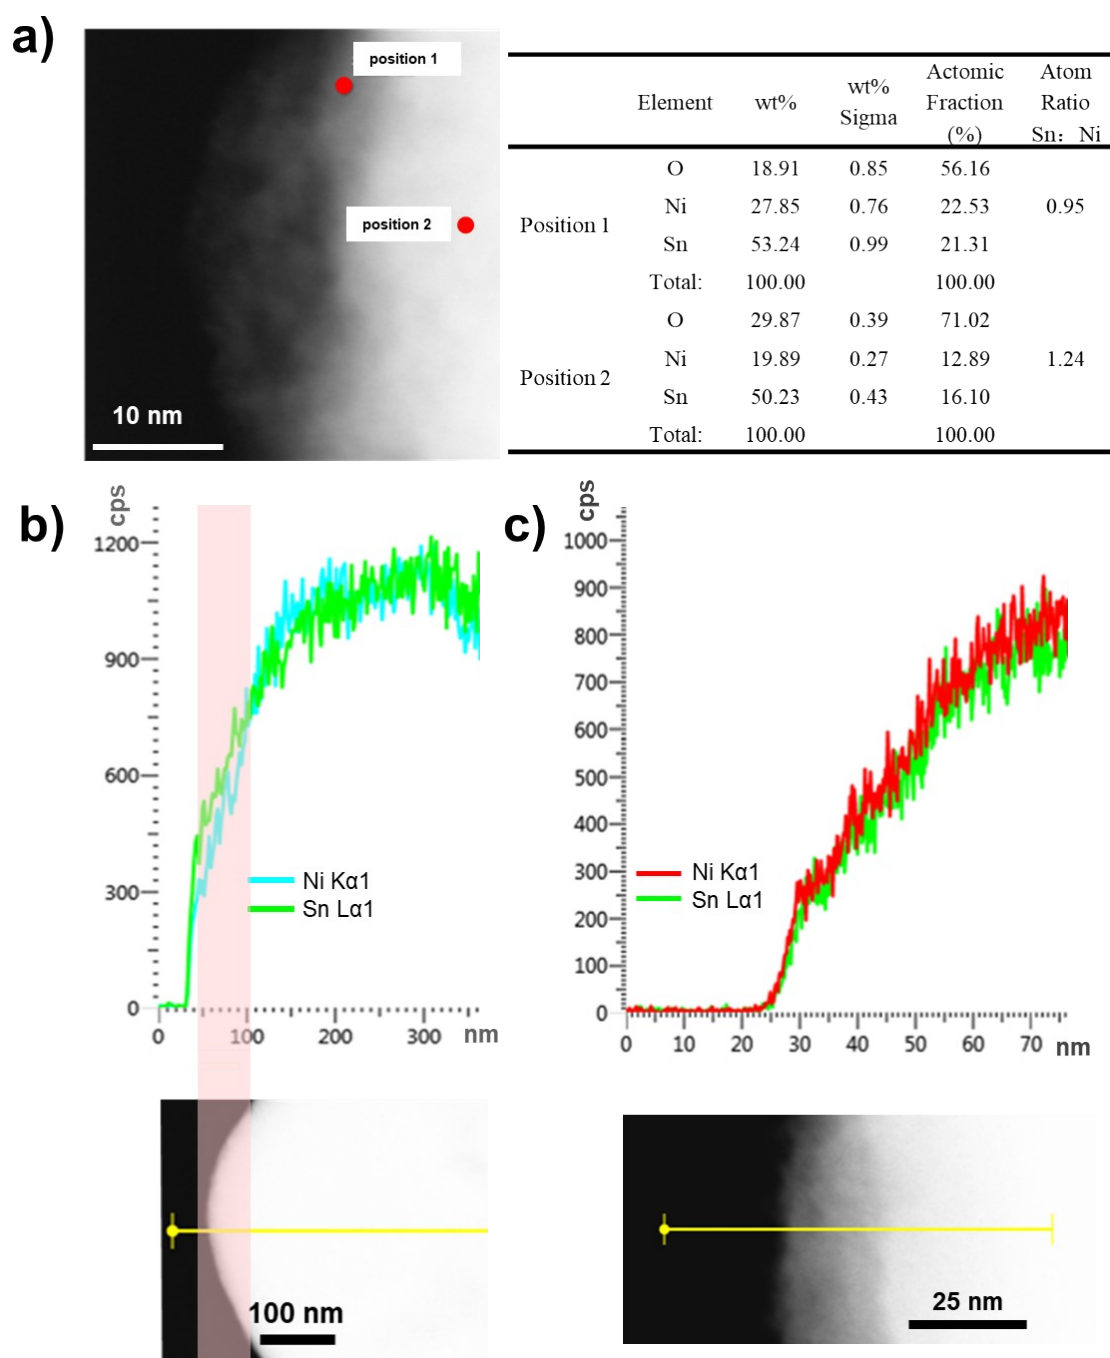

**Figure S7.** (a)  $\text{NiSn(OH)}_6\text{@OOH}$  point scan and corresponding analysis, (b)  $\text{NiSn(OH)}_6$  line scan path and corresponding analysis, (c)  $\text{NiSn(OH)}_6\text{@OOH}$  line scan path and corresponding analysis.



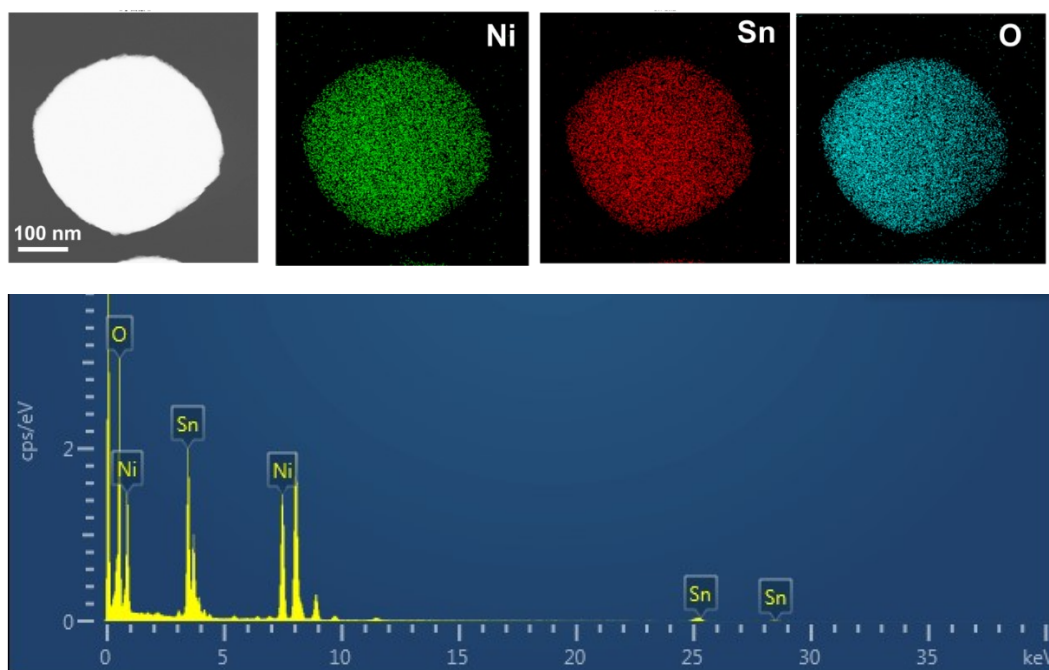

| Element | Family | wt%    | wt% Sigma | Atomic Fraction (%) |
|---------|--------|--------|-----------|---------------------|
| O       | K      | 22.95  | 0.31      | 63.10               |
| Ni      | K      | 22.00  | 0.25      | 16.49               |
| Sn      | L      | 55.05  | 0.35      | 20.41               |
| Total   |        | 100.00 |           | 100.00              |

**Figure S8.** EDS element mapping images of  $\text{NiSn(OH)}_6$  and analysis.

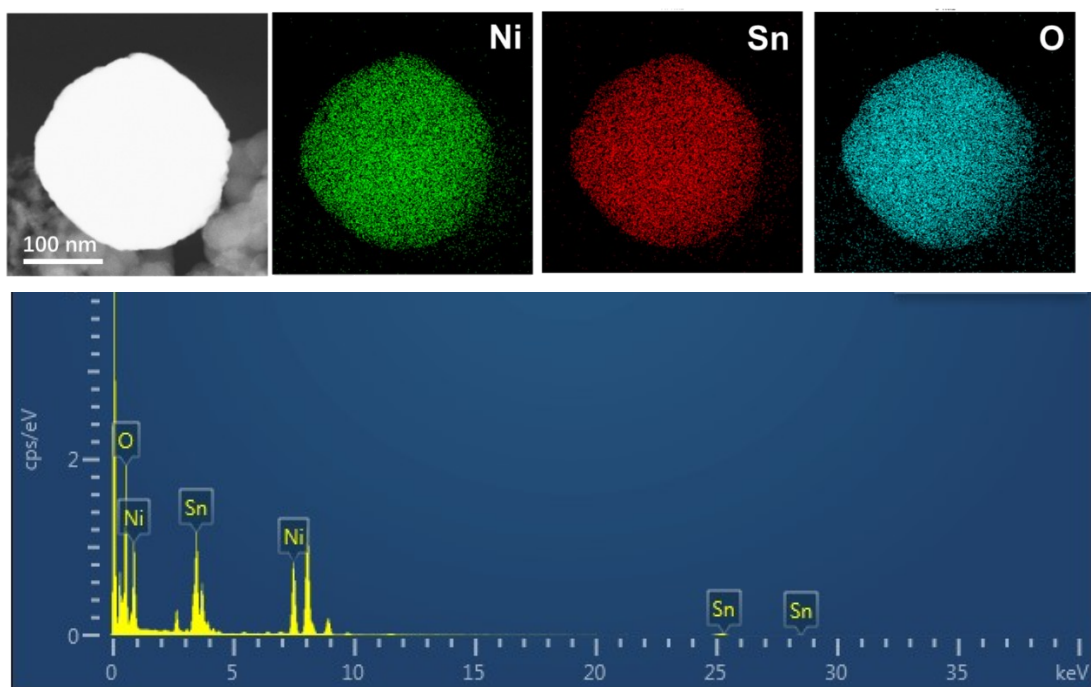

| Element | Family | wt%    | wt% Sigma | Atom Fraction (%) |
|---------|--------|--------|-----------|-------------------|
| O       | K      | 26.17  | 0.31      | 66.50             |
| Ni      | K      | 23.47  | 0.24      | 16.25             |
| Sn      | L      | 50.36  | 0.36      | 17.25             |
| Total   |        | 100.00 |           | 100.00            |

**Figure S9.** EDS element mapping images of  $\text{NiSn(OH)}_6\text{@OOH}$  and analysis.

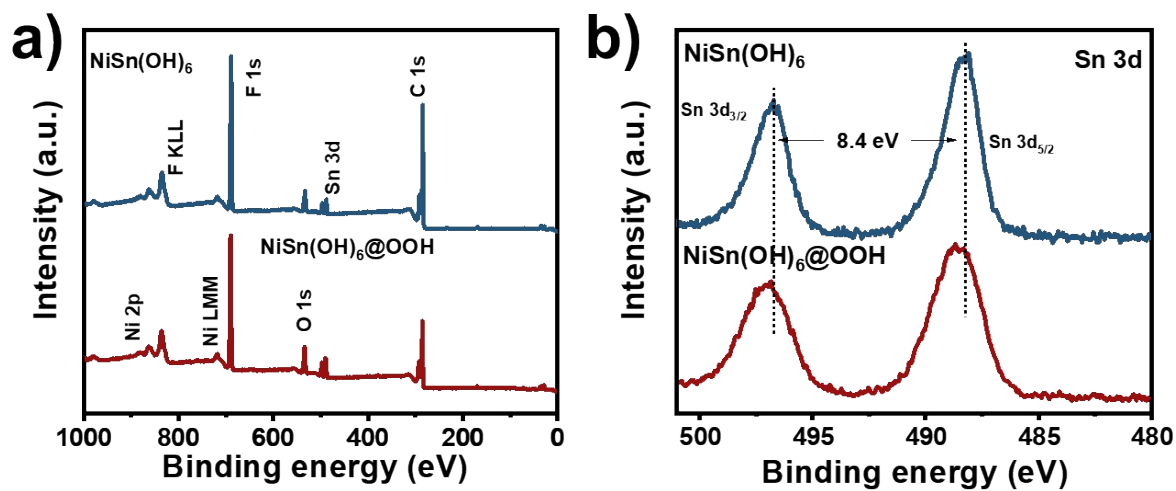

**Figure S10.** (a) XPS spectra of  $\text{NiSn(OH)}_6$  and  $\text{NiSn(OH)}_6@OOH$ , (b) high-resolution

XPS spectra of Sn 3d.

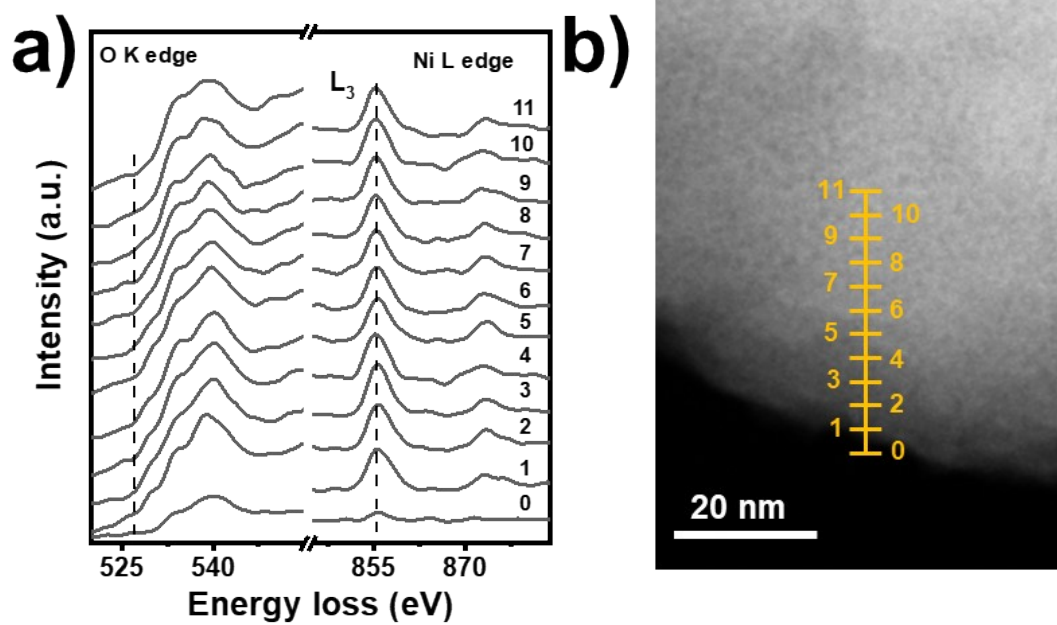

**Figure S11.** The O K-edge and Ni L-edge EELS spectra collected along the junction to the outermost surface of  $\text{NiSn(OH)}_6$ . (b) STEM image of the corresponding scanning pathway for (a).

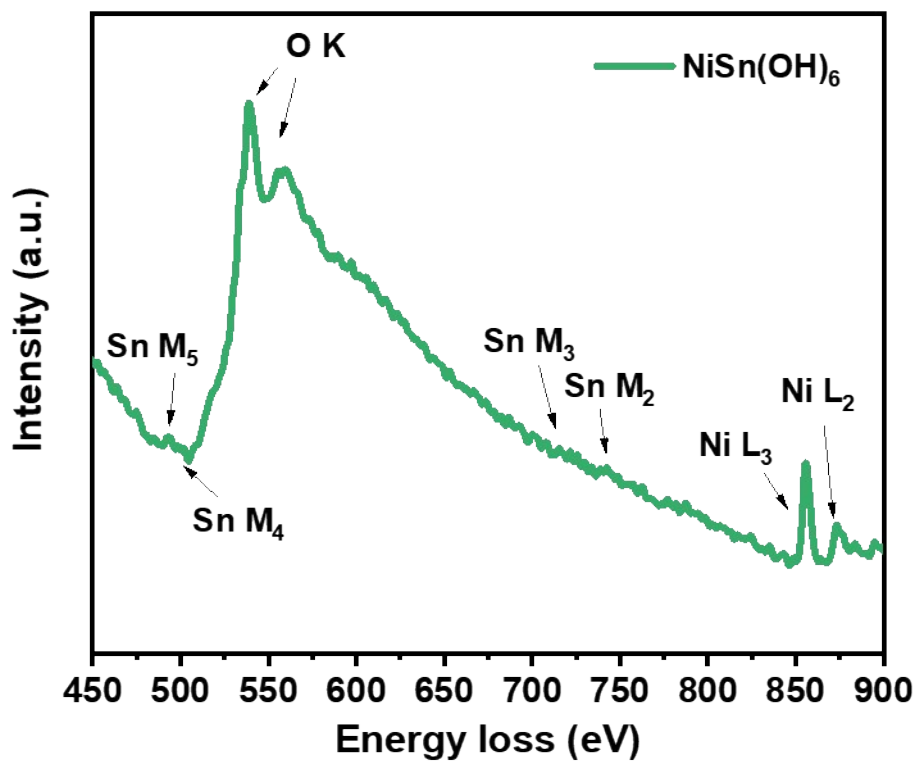

**Figure S12.** The EELS spectra of Sn M-edge recorded on  $\text{NiSn(OH)}_6$ .

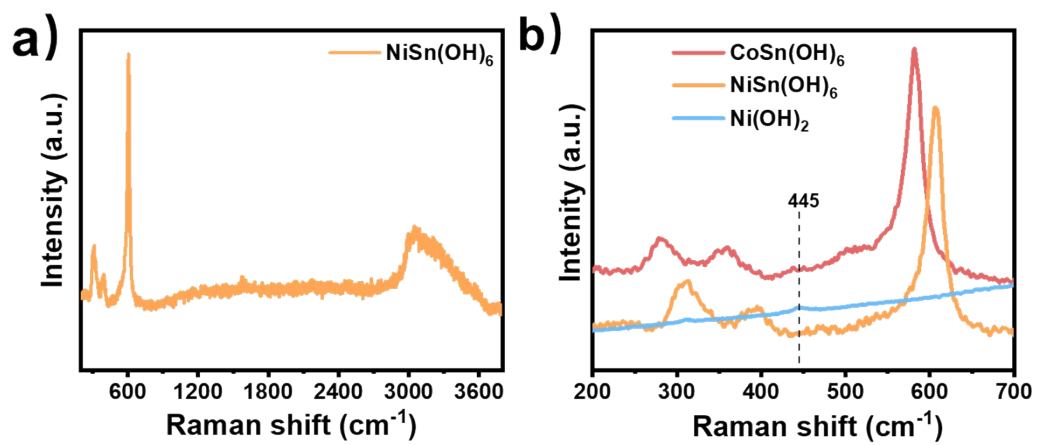

**Figure S13.** Raman spectra of  $\text{NiSn(OH)}_6$ ,  $\text{CoSn(OH)}_6$ , and  $\text{Ni(OH)}_2$ .

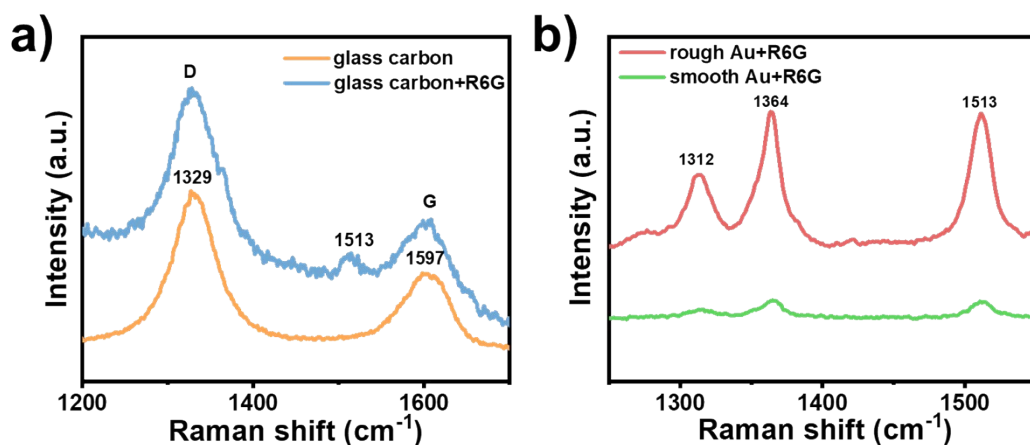

**Figure S14.** Raman spectra of R6G added on (a) glassy carbon electrode and (b) Au electrode with and without surface roughening.  $10^{-3}$  mol L $^{-1}$  of Rhodamine 6G (R6G) solution was dropped on different substrates, tested by Raman spectroscopy with excitation wavelength of 532 nm $^{-1}$  and power of 10%.

The peaks at about 1329 cm $^{-1}$  and 1597 cm $^{-1}$  correspond to the disordered carbon atoms and sp $^2$ -hybridized graphitic carbon atoms, which are the so called D band and G band.<sup>1</sup> The peaks at 1312 cm $^{-1}$ , 1364 cm $^{-1}$  and 1513 cm $^{-1}$  are characteristic peaks of R6G.<sup>2</sup> The RS spectra of glassy carbon electrode dominated by the D band and G band with minor rhodamine signal. A weak R6G signal was observed for the untreated smooth gold sheet and a strong R6G signal was observed for the roughened gold substrate, indicating a significant SERS enhancement of the roughened gold substrate used in this paper, which can effectively improve the sensitivity of RS characterization for tracking the surface evolution of catalyst during the OER process.

1 Y. Wang, D. C. Alsmeyer and R. L. McCreery, *Chem. Mater.*, 1990, 2, 557-563.

2 Y. Liu, J. Lu, Y. Tao, N. Li, M. Yang and J. Shao, *Anal. Chem.*, 2020, 92, 9566-9573.

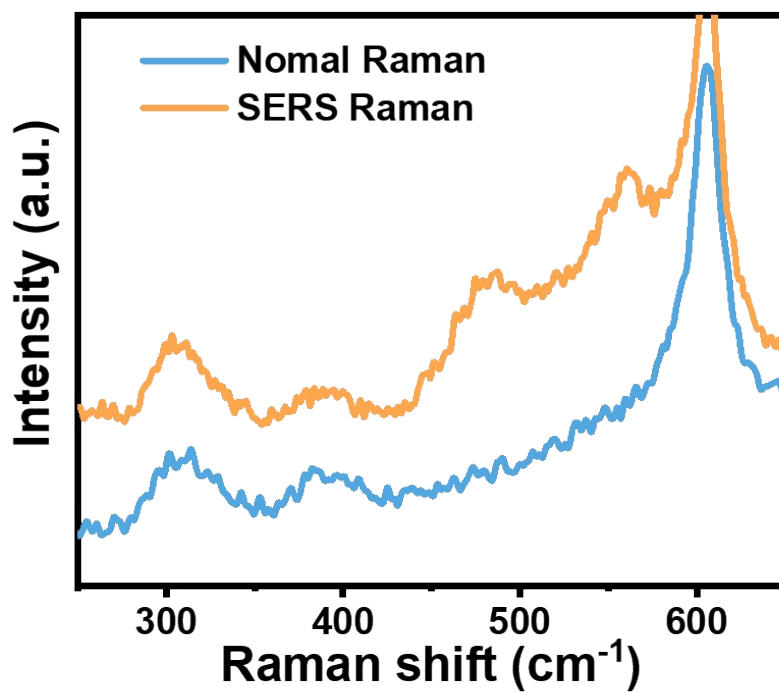

**Figure S15.** Comparison of RS and SERS spectra of the NiSn(OH)<sub>6</sub>@OOH collected at 0.8 V (vs. Hg/HgO).



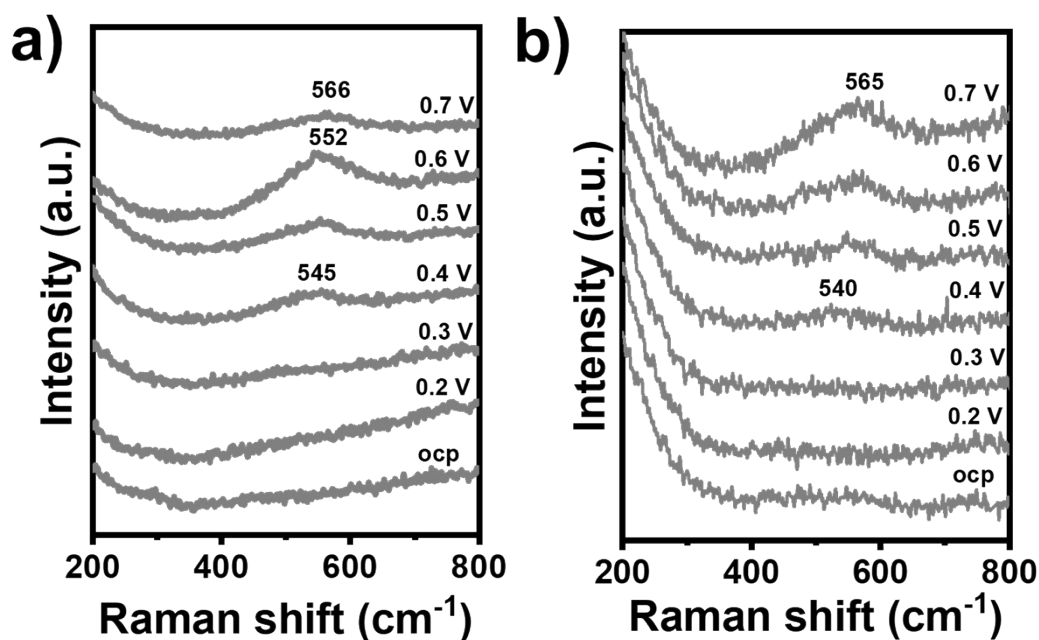

**Figure S16.** In situ RS analysis of the blank roughed gold substrate in 1 M KOH (a) before and (b) after the CV cycling.

In order to clarify the possible effects of the polarization and CV cycling on the SERS substrate, RS data was recorded on the blank roughed gold substrate during the polarization process before and after the CV cycling. A broad peak appeared at 540-565  $\text{cm}^{-1}$  above 0.3 V under both conditions. This peak was found to shift toward high wave number with increasing the applied potential, which behavior is consistent with that reported for the Au-O vibration in  $\text{Au}(\text{OH})_3$  in the literature.<sup>1</sup>

1 M. W. Louie and A. T. Bell, *J. Am. Chem. Soc.*, 2013,135, 12329-12337.

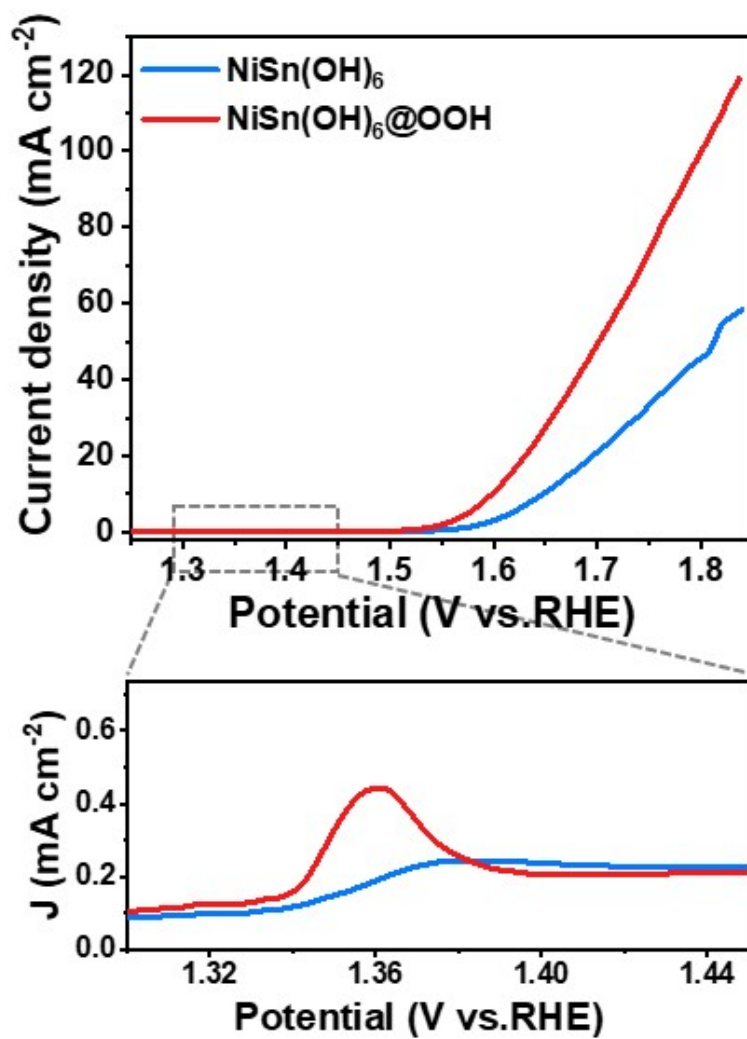

**Figure S17.** LSV curves without iR correction of the catalyst before and after the surface reconstruction process.

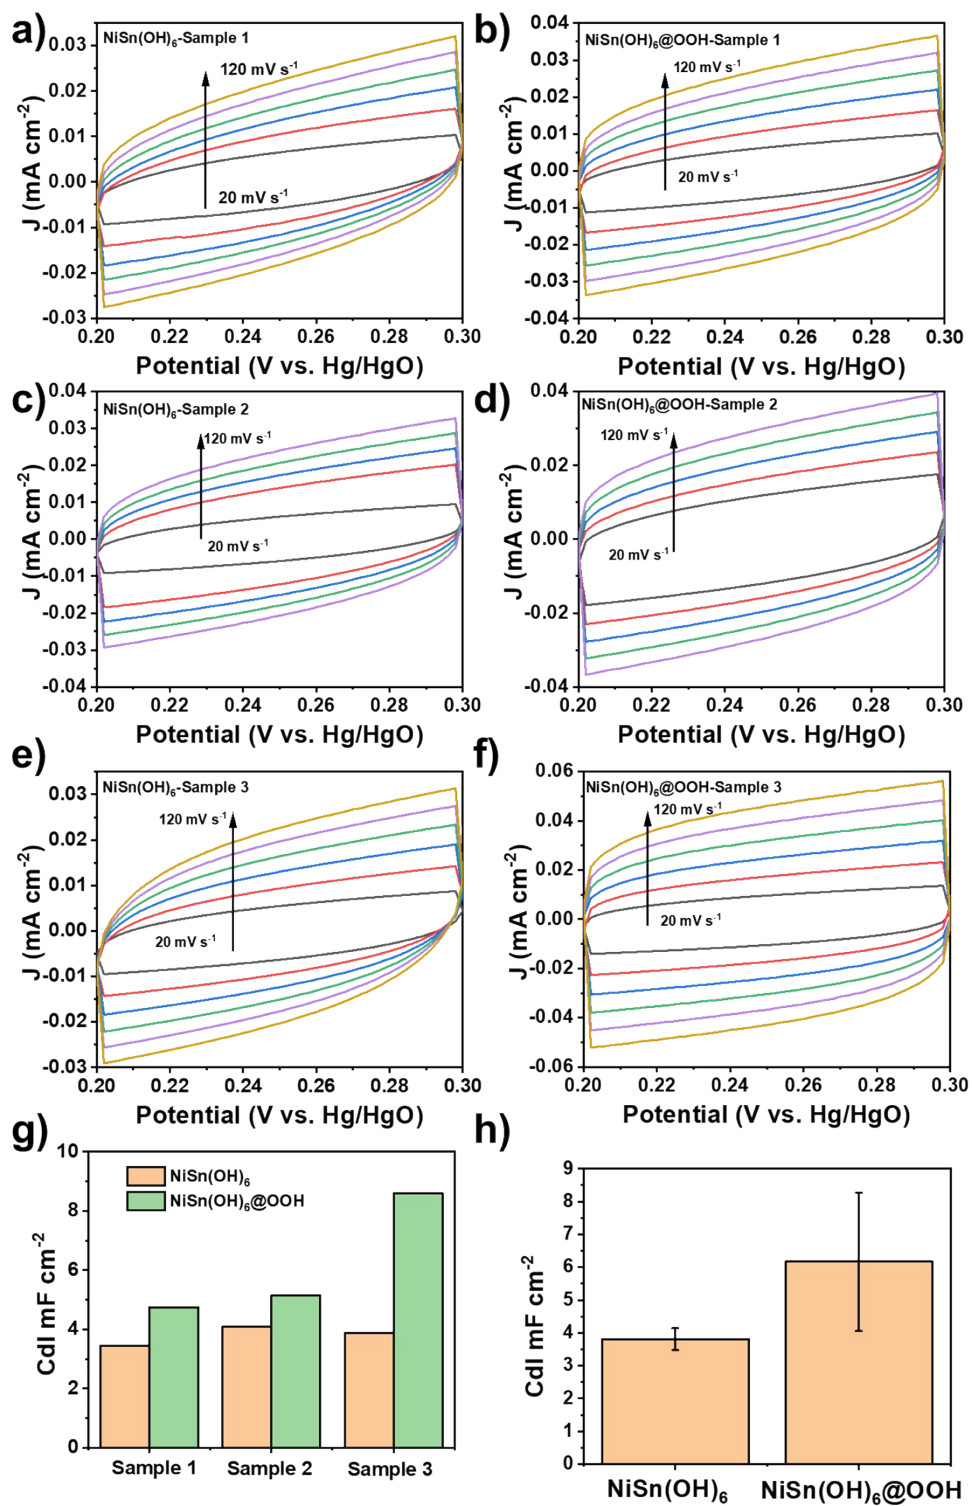

**Figure S18.** Double-layer capacitance measurements on  $\text{NiSn(OH)}_6$  (a, c, and e) and  $\text{NiSn(OH)}_6@OOH$  (b, d, and f): CV scan rates from  $20\text{mV s}^{-1}$  to  $120\text{ mV s}^{-1}$ ; (g) and (h) calculated ECSAs of  $\text{NiSn(OH)}_6$  and  $\text{NiSn(OH)}_6@OOH$ .

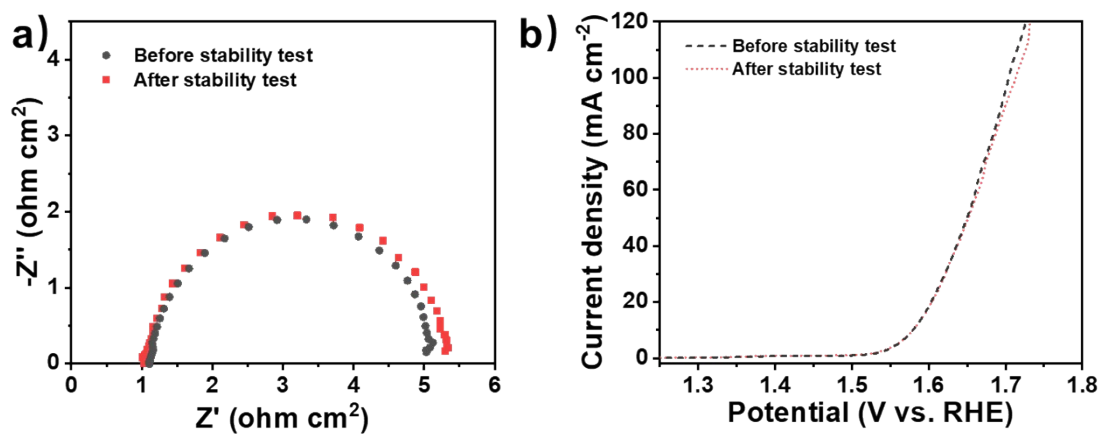

**Figure S19.** (a) EIS and (b) LSV curves of NiSn(OH)<sub>6</sub>@OOH before and after stability

test.

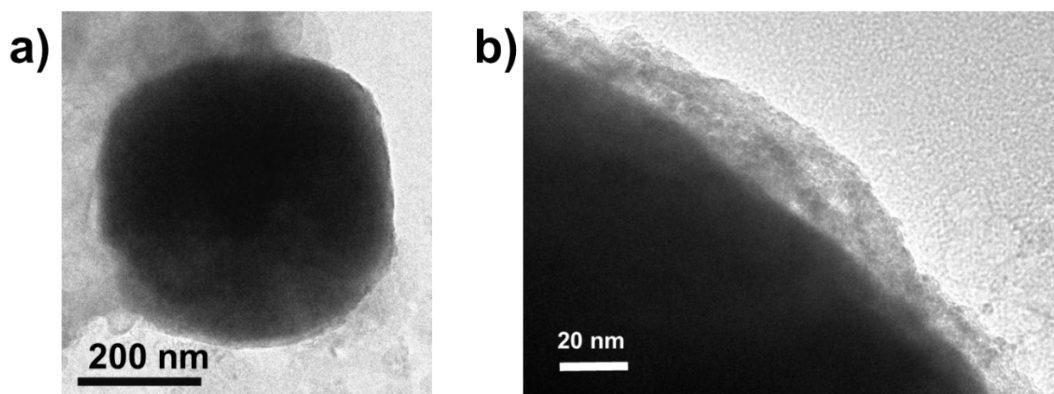

**Figure S20.** (a) TEM and (b) HRTEM images of  $\text{NiSn(OH)}_6@OOH$  after 40,000 s stability test.

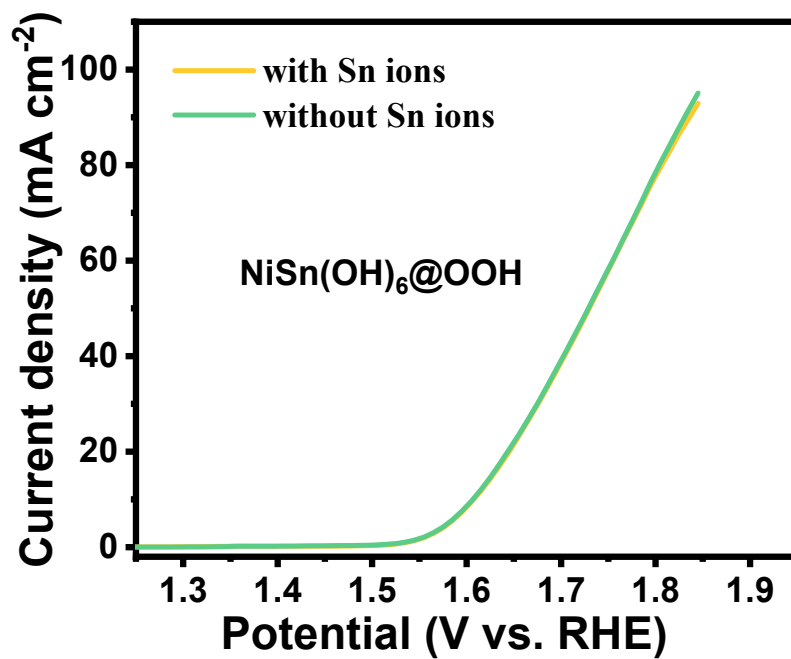

**Figure S21.** LSV curves of the NiSn(OH)<sub>6</sub>@OOH without iR correction in 1M KOH solution with the presence of Sn ions vs. that in fresh 1M KOH (99.99%) solution without the presence of Sn ions.

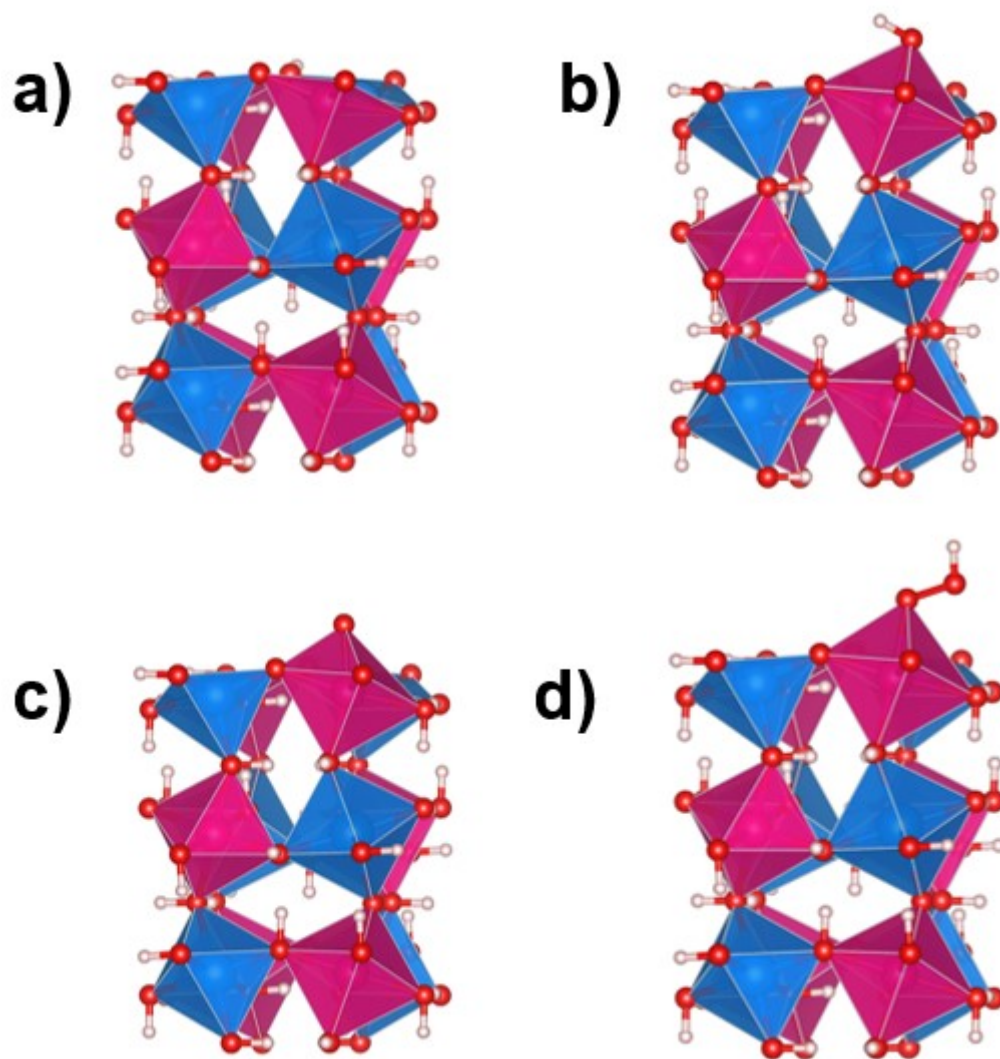

**Figure S22.** Geometric structures of (a)  $\text{NiSn}(\text{OH})_6$  and adsorbed intermediates of (b)  $\text{OH}^*$ , (c)  $\text{O}^*$ , and (d)  $\text{OOH}^*$  on  $\text{NiSn}(\text{OH})_6$ .

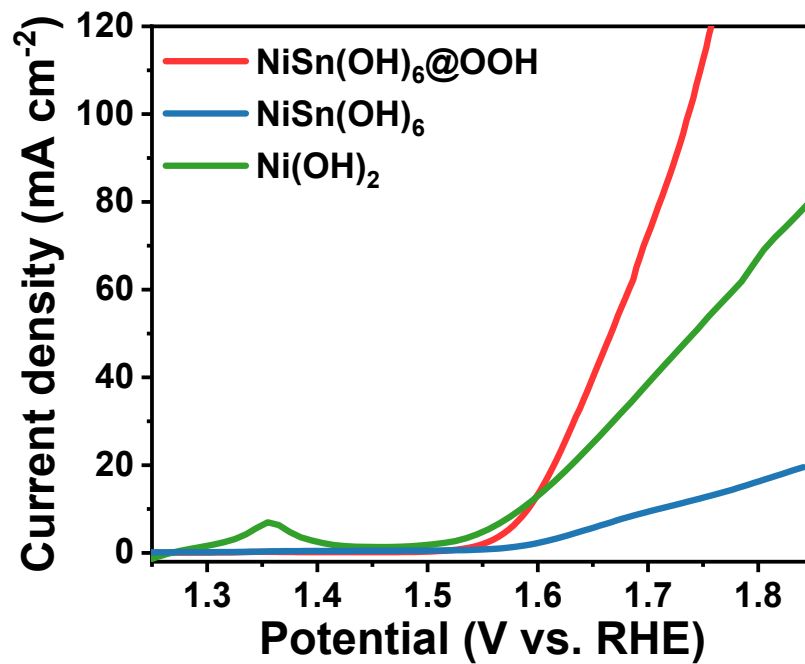

**Figure S23.** LSV curves of NiSn(OH)<sub>6</sub>, NiSn(OH)<sub>6</sub>@OOH and Ni(OH)<sub>2</sub> without iR correction.



**Table S1.** ICP results of NiSn(OH)<sub>6</sub>, SnNiSn(OH)<sub>6</sub>@OOH and the electrolyte after the CV activation process.

| Sample                       | ICP      |          |                   |
|------------------------------|----------|----------|-------------------|
|                              | Sn (ppm) | Ni (ppm) | Atom ration Sn:Ni |
| NiSn(OH) <sub>6</sub>        | 9.687    | 4.921    | 0.97              |
| NiSn(OH) <sub>6</sub> @OOH   | 7.076    | 3.973    | 0.88              |
| Fresh electrolyte            | -        | -        | -                 |
| Electrolyte after activation | 0.26     | -        | -                 |

"-" represents below detection limit.

**Table S2** Comparison of the OER performance for the Ni-based perovskite materials

| Catalysts                                                                                 | $\eta_{@10 \text{ mA cm}^{-2}}$<br>(mV) | Loading<br>(mg cm <sup>-2</sup> ) | Tafel slop<br>(mV dec <sup>-1</sup> ) | References                                  |
|-------------------------------------------------------------------------------------------|-----------------------------------------|-----------------------------------|---------------------------------------|---------------------------------------------|
| NiSn(OH) <sub>6</sub> @OOH                                                                | 370                                     | 0.28                              | 58                                    | This work                                   |
| b-SnNiFe+Graphene                                                                         | 450                                     | 0.25                              | 59                                    | Nat. Commun., 2017, 8, 934                  |
| Sr <sub>0.95</sub> Nb <sub>0.1</sub> Co <sub>0.9-x</sub> Ni <sub>x</sub> O <sub>3-δ</sub> | 438                                     | 1                                 | 64                                    | J. Mater. Chem. A, 2019, 7, 19453           |
| Ni-exsolved CaTiO <sub>3</sub>                                                            | 470                                     | 0.06                              | -                                     | Adv. Energy Mater., 2020, 10, 1903693       |
| LaNiO <sub>3</sub>                                                                        | 446                                     | 0.25                              | 98                                    | Appl. Catal. B: Environ., 2020, 262, 118291 |
| LaNiO <sub>3</sub> @FeOOH                                                                 | 264                                     | 0.25                              | 66                                    |                                             |
| La <sub>n</sub> SrNi <sub>n</sub> O <sub>3n+1</sub>                                       | 380                                     | 0.10                              | 74                                    | Nano Lett., 2020, 20, 2837                  |
| PrNi <sub>x</sub> Co <sub>1-x</sub> O <sub>3-δ</sub> -graphene                            | 380                                     | 0.30                              | -                                     | J. Power Sources, 2020, 46, 227234          |
| La <sub>n+1</sub> Ni <sub>n</sub> O <sub>3n+1</sub>                                       | 370                                     | 0.07                              | 35                                    | Chem. Eng. J., 2021, 409, 128226            |
| LaMn <sub>x</sub> Ni <sub>y</sub> Co <sub>2</sub> O <sub>3</sub>                          | 370                                     | 0.41                              | 80                                    | J. Energy Chem., 2021, 54, 217              |
| LaNiO <sub>3</sub>                                                                        | 442                                     | 0.10                              | -                                     | ACS Catal., 2021, 11, 985                   |
| La(CrMnFeCo <sub>2</sub> Ni)O <sub>3</sub>                                                | 325                                     | 1.2                               | 51                                    | Adv. Funct. Mater., 2021, 31, 2101632       |
| LaNi <sub>x</sub> Fe <sub>1-x</sub> O <sub>3-δ</sub> -QDs/<br>CNTs                        | 340                                     | 0.42                              | 74                                    | Eur. J. Inorg. Chem., 2021, 2225            |
